# Supplementary material for: Epoxygenase inactivation exacerbates diet and aging-associated metabolic dysfunction resulting from impaired adipogenesis
Source: PubMed Central journal article supplement (PMC6001407; doi:10.1016/j.molmet.2018.03.003), 2018-03-09
Supplement: mmc2.pdf [file mmc2.pdf]

# Supplementary Figure A.1

## A Pre-adipocytes

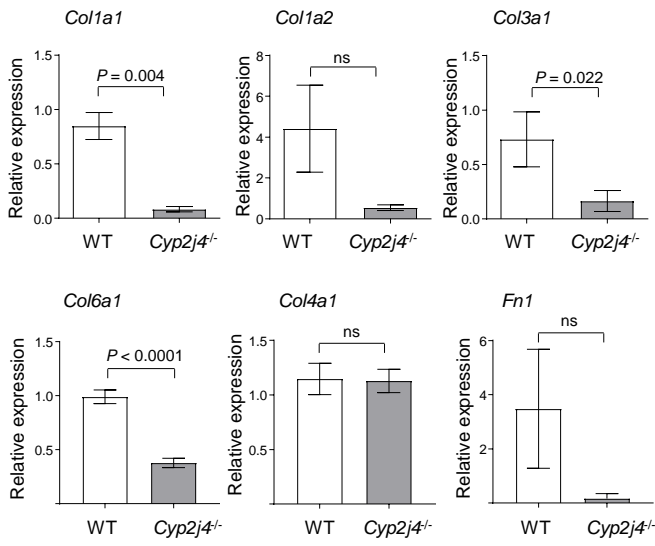

## B Adipocytes

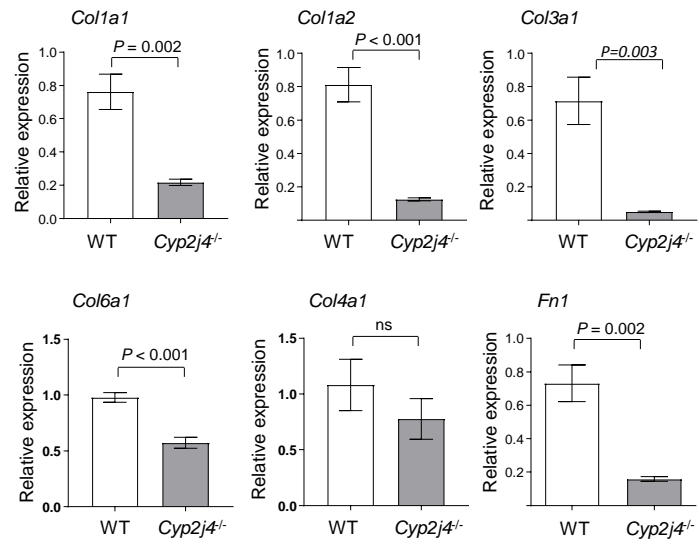

**Supplementary Figure A.1.** Collagen and fibronectin expression in *Cyp2j4*<sup>-/-</sup> MSCs-derived pre-adipocytes and adipocytes. qRT-PCR for *Col1a1*, *Col1a2*, *Col3a1*, *Col6a1*, *Col4a1* and *Fn1* in MSC-derived pre-adipocytes (A) and adipocytes (B) isolated from WT and *Cyp2j4*<sup>-/-</sup> rats. Error bars are s.e.m.

## Supplementary Figure A.2

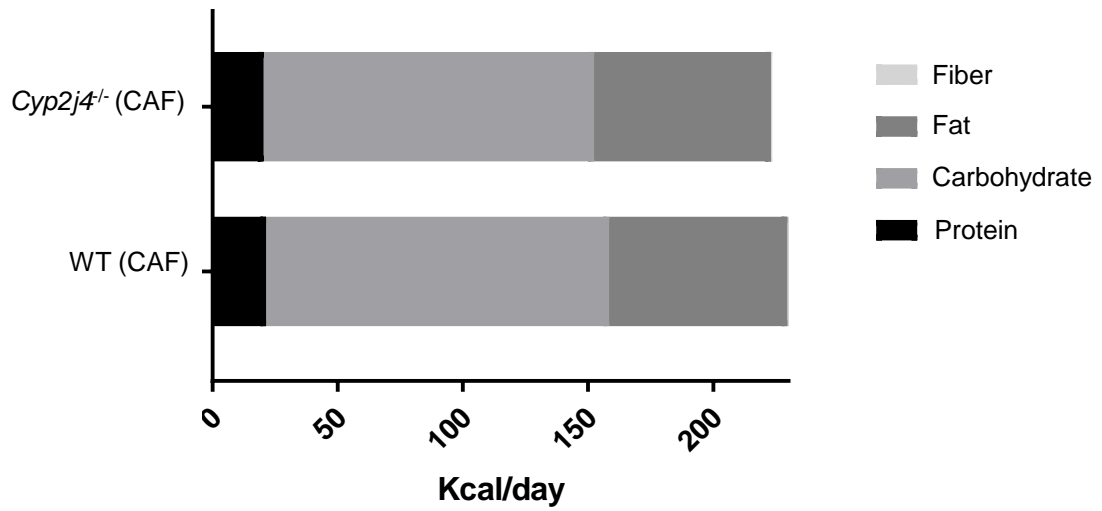

**Supplementary Figure A.2.** Energy intake is not different between *Cyp2j4*<sup>-/-</sup> and WT rats under CAF. Kcal / day in fiber, fat, carbohydrates and proteins measured at 11<sup>th</sup> week following the initiation of CAF.

# Supplementary Figure A.3

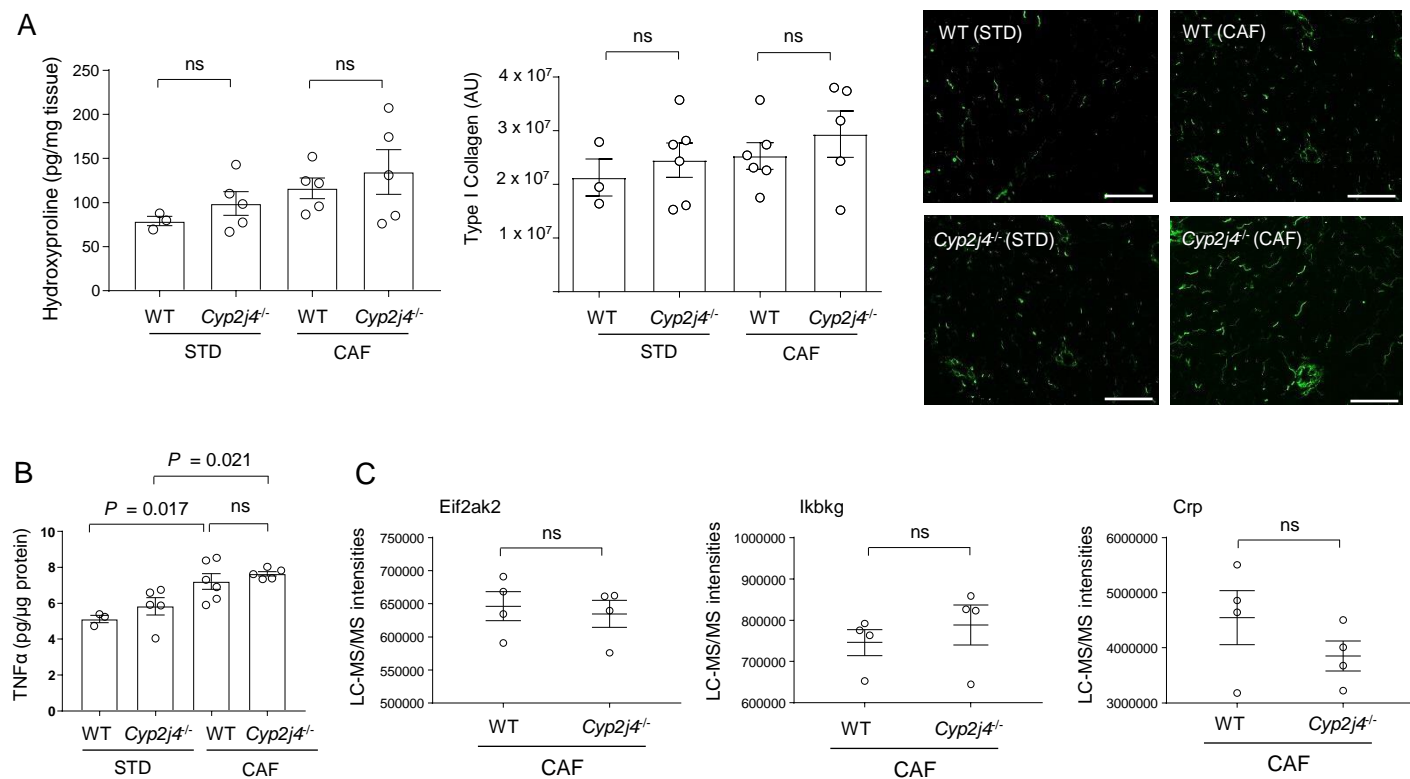

**Supplementary Figure A.3.** *Cyp2j4*<sup>-/-</sup> livers do not show increased inflammatory and fibrotic markers upon CAF. (A) Hydroxyproline levels and type I collagen immunofluorescence quantification in WT and *Cyp2j4*<sup>-/-</sup> livers upon treatment with STD or CAF. (B) TNF $\alpha$  quantification by ELISA in WT and *Cyp2j4*<sup>-/-</sup> livers upon treatment with STD or CAF. (C) LC-MS/MS profiles for hepatic inflammatory markers such as Eif2ak2, Ikbkg and Crp. At least n=3 rats were used by group. Error bars are s.e.m. AU, arbitrary units; ns, non-significant. Scale bars, 100 $\mu$ m.

**Supplementary Figure A.4**

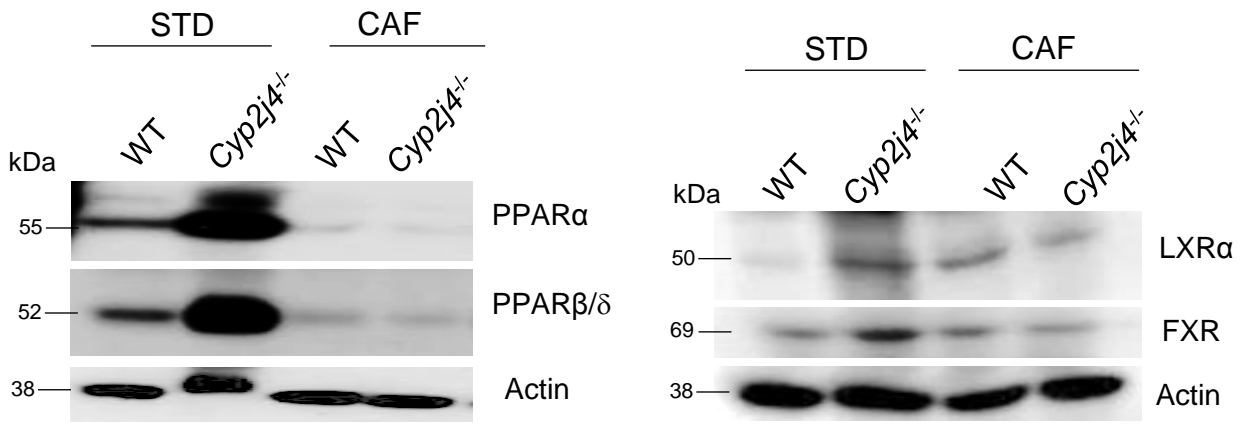

**Supplementary Figure A.4.** Western blot analyses for PPAR $\alpha$ , PPAR $\beta/\delta$ , LXR $\alpha$  and FXR in WAT from WT and *Cyp2j4*<sup>-/-</sup> rats under STD or CAF conditions.

# Supplementary Figure A.5

A

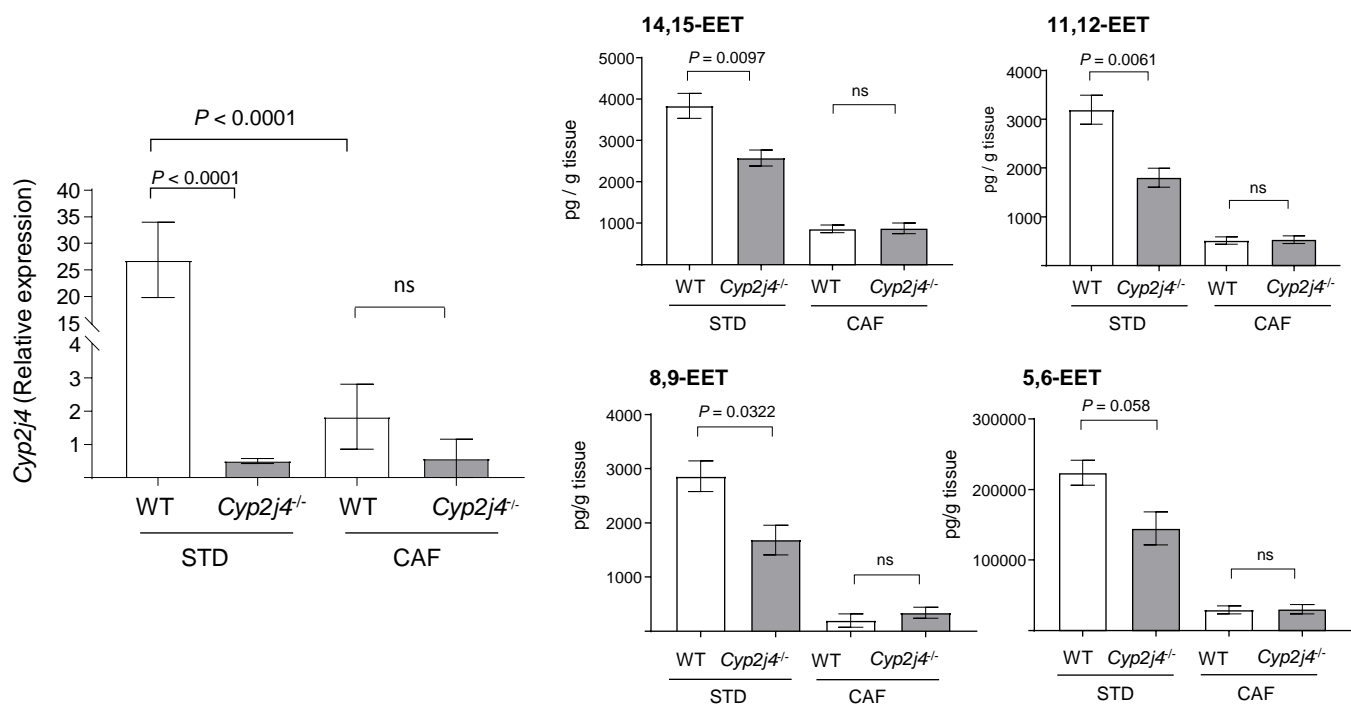

B

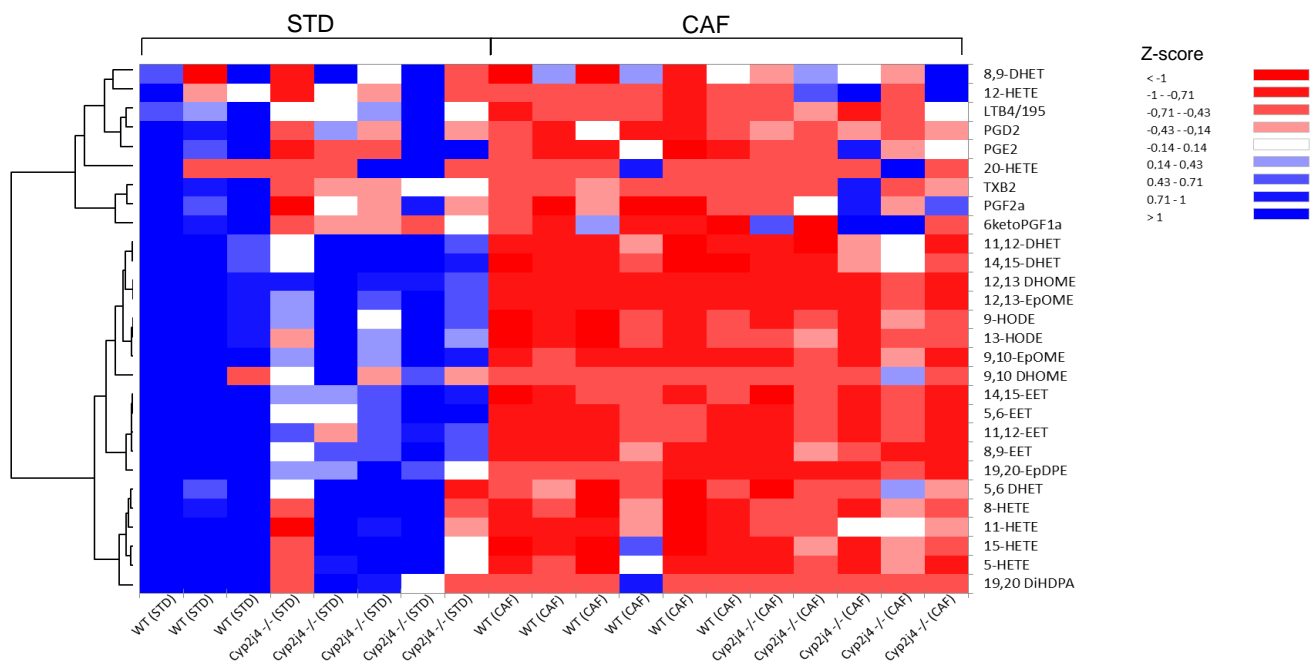

**Supplementary Figure A. 5.** *Cyp2j4* deletion affects WAT EET and oxylipin levels. (A) *Cyp2j4* expression levels measured by qRT-PCR (left panel) in STD and CAF in WT and *Cyp2j4*<sup>-/-</sup> WAT. The right panel shows LC-MS analysis of 4 EET regioisomers in STD and CAF in WT and *Cyp2j4*<sup>-/-</sup> WAT. (B) Heatmap showing 28 eicosanoids measured by LC-MS in WT and *Cyp2j4*<sup>-/-</sup> WAT under STD and CAF. At least n=3 rats/group; error bars are s.e.m. ns, non-significant.

# Supplementary Figure A.6

A

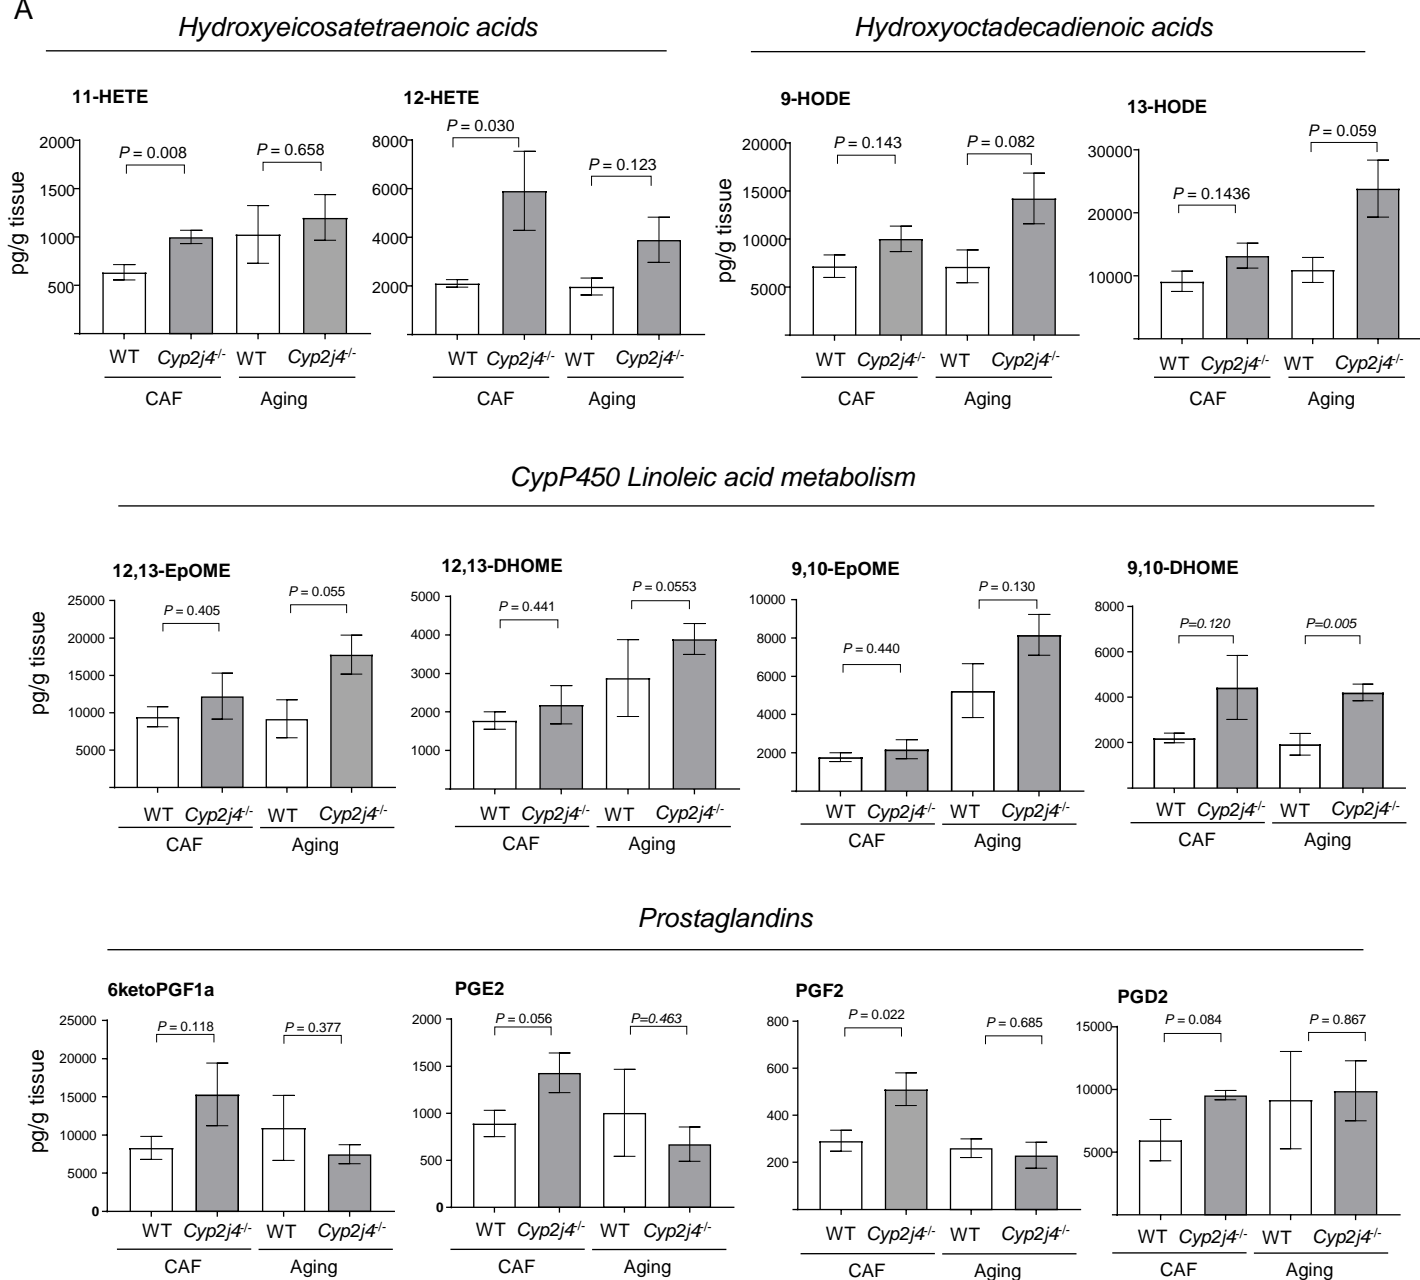

B

| Gene           | FPKM  | LogFC* | P                       | FDR                      |
|----------------|-------|--------|-------------------------|--------------------------|
| <i>Cyp2j4</i>  | > 10  | -4.62  | 5 x 10 <sup>-86</sup>   | 1.51 x 10 <sup>-84</sup> |
| <i>Ptgs2</i>   | >1    | 4.15   | 1.62 x 10 <sup>-8</sup> | 7.36 x 10 <sup>-6</sup>  |
| <i>Ptgs</i>    | >10   | 1.30   | 0.13                    | 1.00                     |
| <i>Ptgs1</i>   | >50   | -0.08  | 0.50                    | 1.00                     |
| <i>Ptgs3</i>   | > 300 | -0.08  | 0.51                    | 1.00                     |
| <i>Ptgs2</i>   | >5    | 0.09   | 0.61                    | 1.00                     |
| <i>Alox5ap</i> | >50   | 0.22   | 0.10                    | 1.00                     |
| <i>Alox12</i>  | >1    | -0.11  | 0.77                    | 1.00                     |
| <i>Cyp2d1</i>  | >1    | 0.07   | 0.77                    | 1.00                     |
| <i>Cyp2r1</i>  | >1    | -0.29  | 0.26                    | 1.00                     |
| <i>Cyp2u1</i>  | >1    | 0.13   | 0.43                    | 1.00                     |
| <i>Cbr3</i>    | >1    | 0.26   | 0.21                    | 1.00                     |

**Supplementary Figure A.6.** AA and LA-derived oxylipins are increased in the *Cyp2j4*<sup>-/-</sup> WAT as a consequence of CAF or aging. (A) *Cyp2j4* deletion affects WAT HETE, HODE, EpOME, DHOME and prostaglandin levels in either aging or CAF conditions. At least n=3 rats/group. The LC-MS measurements are pg/g tissue for all oxylipins. (B) RNA-seq results in WT and *Cyp2j4*<sup>-/-</sup> BMDMs. FPKM, Fragments Per Kilobase of transcript per Million mapped reads; FC, fold change; FDR, false discovery rate. Error bars are s.e.m.
